## 25 **Summary**

26 Advanced fluorescence microscopy studies require specific and monovalent molecular labelling  
27 with bright and photostable fluorophores. This necessity led to the widespread use of fluorescently  
28 labelled nanobodies against commonly employed fluorescent proteins. However, very little is  
29 known how these nanobodies influence their target molecules. Here, we observed clear changes  
30 of the fluorescence properties, mobility and organisation of green fluorescent protein (GFP) tagged  
31 proteins after labelling with an anti-GFP nanobody. Intriguingly, we did not observe any co-  
32 diffusion of fluorescently-labelled nanobodies with the GFP-labelled proteins. Our results suggest  
33 significant binding of the nanobodies to a non-emissive, oligomerized form of the fluorescent  
34 proteins, promoting disassembly into more monomeric forms after binding. Our findings show that  
35 great care must be taken when using nanobodies for studying dynamic and quantitative protein  
36 organisation.

37

38

39

40

41

42

43

44

45

46

47

48

49

## 50 **Introduction**

51 Labelling a protein of interest with an antibody is a well-established procedure in molecular  
52 biology. Rather large size and multivalence of antibodies, however, limit their application as  
53 labelling agents in imaging approaches. Over the past years, the popularity of antigen-binding  
54 fragments of antibodies (Fabs) and single-chain nanobodies derived from camelids or shark  
55 antibodies grew vastly (Beghein and Gettemans, 2017; Carrington et al., 2019; Leslie, 2018). Both  
56 types of molecules are much smaller than full-length antibodies, yet possess similar binding  
57 properties to their target proteins (Harmsen and De Haard, 2007; Sahl et al., 2017). Moreover, they  
58 only have a single binding site which prevents cross-linking and artificial clustering (Pereira et al.,  
59 2019; Sograte-Idrissi et al., 2020; Stanly et al., 2016). Additionally, the stoichiometric labelling of  
60 full length antibodies is challenging, whereas fluorescent labelling of a nanobody with 1:1  
61 (nanobody:dye) ratio is regularly achieved (Grußmayer et al., 2014). Nanobodies have  
62 successfully been raised against various target molecules and used in microscopy (Pleiner et al.,  
63 2015, 2018). Some examples for nanobody epitopes include histones (Jullien et al., 2016), viral  
64 protein (Cao et al., 2019), artificial peptides (Braun et al., 2016), clathrin coat components (Traub,  
65 2019), vimentin (Maier et al., 2015) and many more (Aguilar et al., 2019; Mikhaylova et al., 2015).  
66 Interestingly, a study using nanobodies targeting synaptic proteins and making use of the  
67 nanobodies' smaller size and better penetration capabilities suggested a new pool of synaptic  
68 vesicles (Maidorn et al., 2019). The production methods and costs of generating a novel nanobody  
69 are comparable to the ones for a standard monoclonal antibody, however, the nanobody can  
70 subsequently be produced and harvested from bacteria, yeast or mammalian cell culture and even  
71 recombinantly tagged (Arbabi Ghahroudi et al., 1997; Beghein and Gettemans, 2017; Pleiner et  
72 al., 2018).

73 The use of nanobodies in microscopy was fuelled by the development of a green fluorescent  
74 protein (GFP) binding nanobody (Ries et al., 2012). GFP or its derivatives (like the enhanced GFP,  
75 EGFP) are attractive targets for super-resolution microscopy as they can be considered the  
76 biologist's favourite tag, and a GFP-tagged version of a protein of interest is routinely cloned.  
77 However, compared to organic dyes, the brightness and photostability of GFP and its variants is  
78 usually worse, limiting its use in some applications. Here, the use of anti-GFP nanobodies labelled  
79 with, for example, an organic dye with desired chemical or photophysical properties paved the

80 way for a variety of applications (Beghein and Gettemans, 2017; Buser et al., 2018; Fabricius et  
81 al., 2018; Farrants et al., 2020; Ries et al., 2012; Sahl et al., 2017) and the development of  
82 nanobodies against other fluorescent proteins (FPs) (Platonova et al., 2015). This, in turn, allowed,  
83 for example, for multi-colour super-resolution imaging with nanobodies (Sograte-Idrissi et al.,  
84 2019).

85 The binding of the anti-GFP nanobody to GFP has been characterized (Kirchhofer et al., 2010;  
86 Klamecka et al., 2015; Della Pia and Martinez, 2015) and it has already been noted that the binding  
87 of a nanobody to a fluorescent protein can change the photophysical properties of GFP such as  
88 fluorescence brightness, depending on the binding site (Kirchhofer et al., 2010). This influence  
89 has been exploited for in vivo studies (Llama Tags in fruit fly embryo (Bothma et al., 2018)).  
90 General fluorescence properties of GFP have been studied in depth (Conyard et al., 2011; Jung et  
91 al., 2005), and its fluorescence brightness and lifetime, as well as excited- and dark-state  
92 populations have been shown to depend on environmental characteristics such as solvent  
93 properties (e.g. pH, viscosity), illumination intensity, and wavelength (Ghosh et al., 2017; Jung et  
94 al., 2005; Lippincott-Schwartz and Patterson, 2009; Niwa et al., 1996; Tsien, 1998).

95 Influences of the nanobody on the functionality of the FP-tagged protein have been indicated  
96 before (Küey et al., 2019), and we here present new insights by investigating effects of nanobody  
97 binding on the fluorescence emission, organization and mobility of GFP-tagged proteins.  
98 Specifically, we used commercially available unlabelled and fluorescently labelled GFP-binding  
99 nanobodies (Nb) in combination with fluorescence imaging and spectroscopic tools such as  
100 fluorescence correlation spectroscopy (FCS) for GFP and EGFP in solution, attached to synthetic  
101 membranes, and expressed on the surface of live cells as (E)GFP-tagged GPI-anchored proteins.  
102 Our data suggests that the anti-GFP Nb binds a dark oligomeric form of GFP and promotes  
103 reorganization by releasing bright monomers.

## 104 **Results and Discussion**

### 105 *Nanobody binding in solution*

106 We first investigated the basic fluorescence properties of GFP and EGFP before and after addition  
107 of unlabelled nanobody (Nb) in solution. Specifically, using a fluorescence spectrometer we  
108 investigated changes in total fluorescence intensity and fluorescence spectra for recombinant his-

109 tagged (E)GFP in PBS (pH 7.4, room temperature). Figure 1 shows the respective excitation and  
110 emission spectra. As reported before (Tsien, 1998), we found two excitation peaks at around 395  
111 nm and 480 nm for GFP corresponding to the neutral and deprotonated (anionic) state of the  
112 fluorochrome, respectively (Chattoraj et al., 1996; Chudakov and Lukyanov, 2003), and one  
113 excitation peak at around 480 nm for EGFP (Figure 1a,b). The anionic state is usually considered  
114 for fluorescence microscopy experiments, using a standard 488 nm laser line for excitation. Due  
115 to the requirement for UV excitation, the neutral form of GFP is less used. Interestingly and already  
116 previously indicated (Kirchhofer et al., 2010), Nb binding promotes anionic state absorption,  
117 revealed by a  $\approx$  2-fold reduction of the excitation peak at 390 nm and a corresponding  $\approx$  3-fold  
118 increase at 480 nm for GFP (Figure 1a). Similarly but less pronounced, the excitation peak at  
119 around 480 nm also increased by 25% for EGFP upon interaction with the Nb (Figure 1b). The  
120 Nb binding did not induce any shifts in the emission spectra of GFP or EGFP (excited with 488  
121 nm, Figure 1c,d), also not under UV excitation (405 nm excitation, Figure 1e,f), i.e. peak positions  
122 of the spectra remained the same with inefficient excitation of EGFP at 405 nm. Overall, in solution  
123 GFP and EGFP experience a  $\approx$  3.5– and  $\approx$  1.5–fold increase in total integrated fluorescence  
124 emission (510 nm to 600 nm) induced by the Nb binding, apparently mainly due to the increase in  
125 absorption at around 480 nm.

126

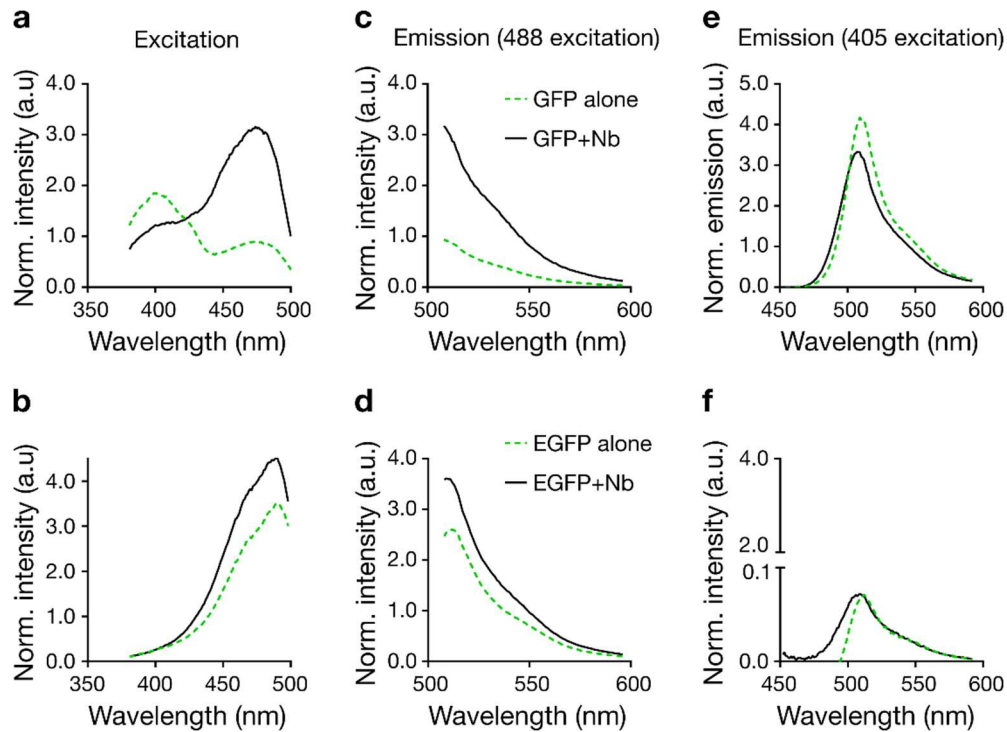

127

128 **Figure 1: Change in excitation and emission spectra of recombinant GFP and EGFP in solution upon**  
129 **addition of unlabelled Nb.** Excitation spectra for fluorescence detection at 510 - 520 nm (a,b) and emission  
130 spectra following 488 nm (c,d) and 405 nm excitation (e, f) of GFP-His (a,c,e) and EGFP-HIs (b,d, f)  
131 without Nb (green dashed line) and with unlabelled Nb (solid black line). All spectra are averages of three  
132 measurements.

### 133 *Nanobody binding on GUV membranes*

134 In cell biology and microscopy, antibodies and nanobodies are commonly used to investigate the  
135 spatial organisation of membrane proteins. Therefore, we next tested changes in fluorescence  
136 properties of (E)GFP fluorescence at lipid membranes upon binding of unlabelled Nb. We first  
137 chose controlled conditions, employing GFP and EGFP attached to synthetic membranes of giant  
138 unilamellar vesicles (GUVs, made of dipalmitoylphosphatidylcholine (DOPC) lipid) via a His-tag  
139 (using DGS-NTA (1,2-dioleoyl-sn-glycero-3-[(N-(5-amino-1-carboxypentyl)iminodiacetic  
140 acid)succinyl])). For both GFP and EGFP, we observed an increase in total fluorescence intensity  
141 upon addition of unlabelled Nb, slightly higher ( $\approx 2 - 4$  fold) than in solution and with slight  
142 differences between GFP and EGFP (4-fold compared to 2.5-fold, respectively) (Figure 2a,b).

143 To decipher this slight difference in increase in fluorescence intensity further, we tested how the  
144 fluorescence emission per individual GFP and EGFP molecule changed upon Nb binding. For this,

145 we determined the molecular fluorescence brightness or fluorescence count rate per molecule,  
146 (cpm) derived from fluorescence correlation spectroscopy (FCS, Supplementary Figure 1a,b). FCS  
147 reveals the average emitted photons of a fluorophore by measuring photon statistics from multiple  
148 transits through the microscope's observation spot. On GUVs, we observed an approximately 2-  
149 fold increase in molecular brightness of GFP following Nb addition (Figure 2c), which does not  
150 account for the  $\approx$  4-fold increase in total fluorescence signal intensity (Figure 2b). We therefore  
151 also derived the average number of fluorescing molecules, N, from the same FCS experiments (the  
152 amplitude of the correlation function.  $G(0)$  is inversely correlated to the average number of  
153 molecules N). Strikingly, upon Nb addition, we observed an approximately 2-fold increase in N  
154 (Figure 2d). For EGFP on GUVs there was also an approximately 2-fold change in molecular  
155 brightness cpm (Figure 2e) but in contrast to GFP only a marginal change in N (Figure 2f). As  
156 expected, for both GFP and EGFP the increase in N and cpm together account for the overall  
157 change in total fluorescence signal intensity ( $I = \text{cpm} \times N$ ).

158 While the increase in cpm upon Nb addition may be explained by the change in fluorescence  
159 excitation at around 480 nm as determined from the solution experiments (Figure 1a,b), the change  
160 in N and accordingly in concentration of fluorescing molecules suggests an unexplored enigmatic  
161 impact of Nb on the organisation of the membrane-bound GFP molecules. We will discuss this  
162 and the potential impact on assessing the spatial organisation of (E)GFP-tagged proteins in the  
163 plasma membrane of living cells in detail throughout the next sections.

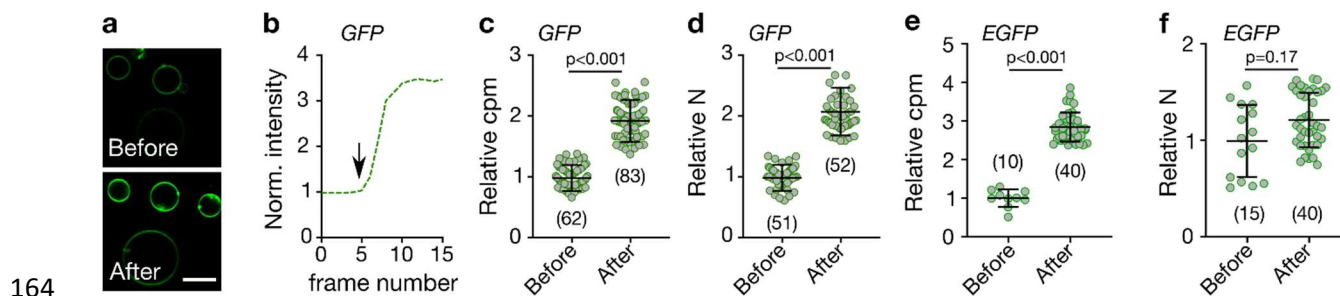

165 **Figure 2. Effect of GFP-nanobody binding on GUV-anchored (E)GFP.** Data for His-tagged (E)GFP  
166 anchored to GUVs (98 mol% DOPC and 2 mol% DGS-NTA) before and after addition of unlabelled Nb as  
167 marked. a) Representative confocal fluorescence microscopy images of the equatorial GUV plane for GFP.  
168 Scale bar 10  $\mu\text{m}$ . b) Representative time-lapse over subsequently recorded confocal image frames of the  
169 normalized fluorescence intensity of the equatorial plane of a GFP-tagged GUV with time point of Nb  
170 addition marked with arrow. Relative change in (c) molecular fluorescence brightness (cpm) and (d) relative



171 number of particles (N) of GFP before and after Nb addition as marked. Relative change in (e) cpm and (d)  
172 N of EGFP before and after Nb addition as marked. Values were determined from FCS experiments on  
173 individual (E)GFP-tagged GUVs. p-values were determined using the Kolmogorov–Smirnov non-  
174 parametric test. Number of data points is indicated on each graph.

175

### 176 *Nanobody binding on live-cell membranes*

177 To test the effect of Nb on (E)GFP-tagged membrane protein organization further and in a more  
178 physiological setting, we next investigated the influence of Nbs on an GFP- and an EGFP-labelled  
179 glycosylphosphatidylinositol (GPI) anchored protein (GPI-AP) in the plasma membrane of living  
180 cells. Specifically, we expressed GFP-LYPD6 and GPI-EGFP in live PtK2 cells. GFP-LYPD6 is  
181 involved in Wnt signalling (Özhan et al., 2013), while GPI-EGFP is simply a lipid-anchored EGFP  
182 construct commonly used as probe to study GPI-AP organisation (Baumgart et al., 2016; Goswami  
183 et al., 2008; Saha et al., 2015; Schneider et al., 2017). We recorded confocal images (Figure 3a,b)  
184 as well as FCS data (Supplementary Figure 1c,d) to determine the total fluorescence intensity and  
185 values of cpm and N. For both proteins we found a modest increase in total fluorescence signal  
186 intensity upon Nb binding ( $\approx 1.1$ -fold for GFP and  $\approx 1.5$ -fold for EGFP, Figure 3c,d), a slight  
187 increase in molecular fluorescence brightness (cpm,  $\approx 1.1$ -fold for GFP and  $\approx 1.5$ -fold for EGFP,  
188 Figure 3e,f), and a distinct variation in average number N of fluorescent molecules in the  
189 observation spot, with a slight  $\approx 1.1$ -fold increase for GFP and a slight  $\approx 1.2$ -fold decrease for EGFP  
190 (Figure 3c,f). However, especially the determination of the number of particles, N, was not  
191 straightforward on the live-cell membrane due to noise, cellular movements and spatial  
192 heterogeneity across the cells (i.e. due to variations in local concentrations as becomes obvious by  
193 variations in total intensity across one cell or between different cells, Figure 3 a,b). Overall, the  
194 impact of Nb binding on fluorescent protein tagged GPI-AP on living cells follows the trend from  
195 the model membranes with attenuated magnitude.



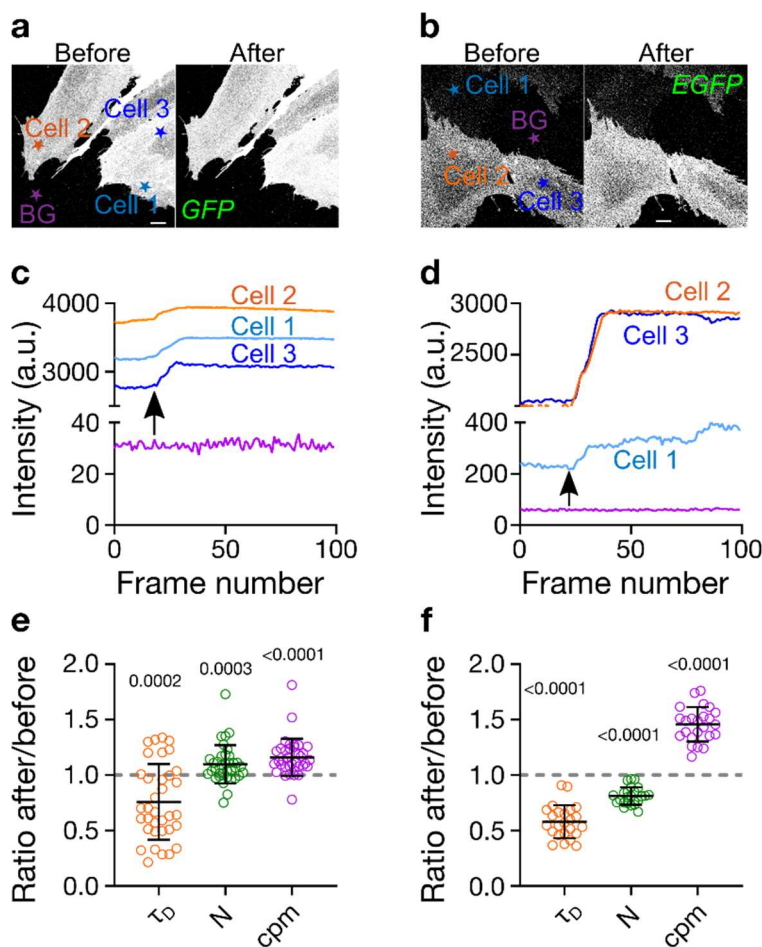

196

197 **Figure 3: Effect of Nb-binding on (E)GFP in the plasma membrane of live PtK2 cells: GPI-anchored**  
 198 **proteins GFP-LYPD6 (left panels) and GPI-EGFP (right panels).** Representative confocal images  
 199 before and after addition of Nb for a) GFP-LYPD6 and b) GPI-EGFP. Scale bars are 10  $\mu$ m. Normalised  
 200 fluorescence intensity traces for c) GFP-LYPD6 and d) GPI-EGFP for the cells as indicated in panel a and  
 201 b, respectively (BG = background). Arrows show the time point when Nb was added. The intensities per  
 202 frame represent mean values over each cell (see Materials and Methods for details). Change in  $\tau_D$ , N and  
 203 cpm for e) GFP-LYPD6 and f) GPI-EGFP upon nanobody addition (values after Nb addition divided by  
 204 values before). Change in average transit time ( $\tau_D$  i.e. mobility), average fluorescing particle number (i.e.  
 205 concentration, N), and molecular fluorescence brightness (cpm) upon Nb addition are determined from FCS  
 206 experiments (one dot = one cell, for each cell 6 – 9 single FCS measurements were averaged, pooled data  
 207 from three different days). The values on top of ratios in e,f indicate p-values obtained from Wilcoxon sign-  
 208 rank non-parametric tests with hypothetical median values of 1 (ratio of 1 would indicate no change upon  
 209 Nb addition).

210

## 211 *Nanobody effect on molecular mobility*

212 So far, we obtained interesting insights from the stationary thermodynamic information from  
213 imaging and FCS (intensity, cpm and N), but the FCS measurements also allowed us to determine  
214 the average mobility of the membrane-anchored proteins. Measuring the diffusion dynamics can  
215 be performed robustly against local variations in concentration and expression levels and  
216 represents a way to study the organisation of plasma membrane constituents (Pinkwart et al., 2019;  
217 Schneider et al., 2020) . From FCS, we obtained the transit time  $\tau_D$ , representing the average time  
218 it takes a molecule to cross the observation spot, and tested whether it changes upon Nb addition  
219 (Supplementary Figure 1). Intuitively, one may expect a slight decrease in mobility i.e. increase in  
220 values of  $\tau_D$  upon addition of Nb due to the increased mass of the complex. Alternatively, one  
221 could expect no change at all as the mobility of membrane constituents is overwhelmingly  
222 determined by the properties of the membrane anchor (Saffman and Delbrück, 1975; Weiß et al.,  
223 2013). However, interestingly, we observed an increase in mobility after Nb addition for GFP-  
224 LYPD6 and GPI-EGFP in the membrane of live PtK2 cells (approximately 1.25 and 1.7-fold  
225 decrease in values of  $\tau_D$  for GFP and EGFP, respectively; Figure 3e,f). From these  $\tau_D$ -values and  
226 the diameter  $d = 240$  nm of the observation spot (full-width-at-half-maximum), we can estimate  
227 values of the diffusion coefficients given the diffusion equation ( $D = \frac{d^2}{\ln(2) \cdot 8 \cdot \tau_D}$ ) to  $D = 0.3 \mu\text{m}^2/\text{s}$   
228 and  $0.4 \mu\text{m}^2/\text{s}$  for GFP-LYPD6 without and with Nb and  $D = 0.8 \mu\text{m}^2/\text{s}$  and  $1.4 \mu\text{m}^2/\text{s}$  for GPI-  
229 EGFP without and with Nb. Previously reported values for GPI-AP diffusion scatter from 0.3 to  
230  $1.0 \mu\text{m}^2/\text{s}$  (Chojnacki et al., 2017; Eggeling et al., 2009; Huang et al., 2015; Lenne et al., 2006;  
231 Schneider et al., 2017; Veerapathiran and Wohland, 2017) where GPI-(E)GFP typically shows  
232 faster diffusion than other GPI-anchored probes (such as GPI-ACP or GPI-SNAP).

233 The apparent speed-up upon nanobody binding was puzzling, and to confirm these contradictory  
234 findings, we additionally recorded FCS data of GFP-LYPD6 and GPI-EGFP in living cells with  
235 higher statistical accuracy. Specifically, we performed scanning-FCS (sFCS) measurements,  
236 which yield simultaneous FCS data for multiple points along a quickly scanned line, i.e. hundreds  
237 of values of, for example, cpm and  $\tau_D$  within a few measurement, which accounts for spatial  
238 heterogeneity and allows for the determination of average values with very high precision  
239 (Schneider et al., 2018; Waithe et al., 2018). The sFCS measurements confirmed the changes in  
240 values of  $\tau_D$  i.e. faster diffusion for both GFP-LYPD6 and GPI-EGFP upon Nb binding (Figure

241 4a,b) in line with the point FCS measurements (Figure 3 e,f). Further, our sFCS data revealed that  
242 the increase in mobility (i.e. decrease in transit time  $\tau_D$ ) was clearly correlated with an increase in  
243 brightness, cpm (Figure 4c-f), i.e. upon Nb addition the population of (E)GFP tagged GPI proteins  
244 shifted from a less bright and less mobile to a brighter and more mobile form.

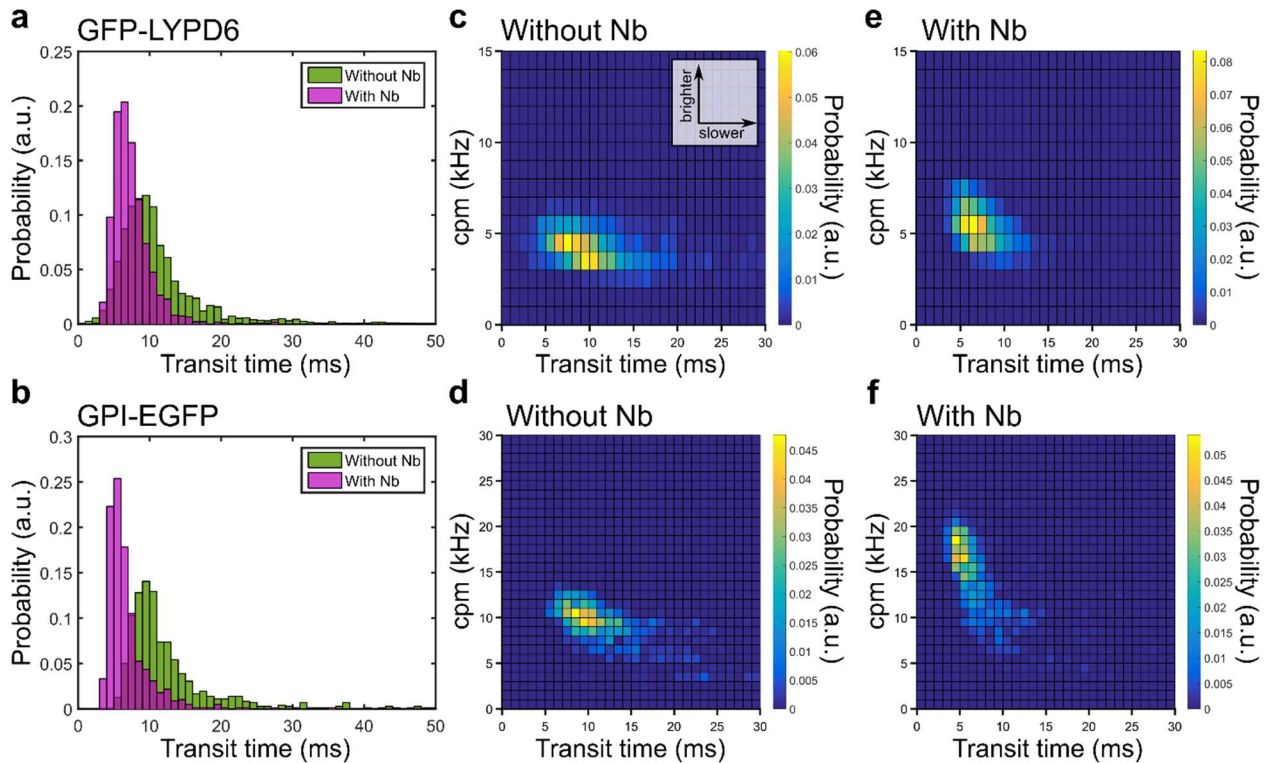

245  
246 **Figure 4. Effect of unlabelled Nb binding on mobility and brightness of GFP-LYPD6 and GPI-EGFP**  
247 **as probed by large sFCS datasets.** Analysis of diffusion dynamics and molecular brightness (cpm) of  
248 PtK2 cells expressing GFP-LYPD6 (upper panels) and GPI-EGFP (bottom panels) and the effect of  
249 unlabelled nanobody. a,b) Transit time histograms for protein without (green) and with (magenta) presence  
250 of nanobody. >2000 curves single FCS curves for GFP-LYPD6 and > 700 for GPI-EGFP from >10 cells  
251 each. c-d) Two-dimensional pair value histograms (bi-variate histograms) of transit times and cpms for  
252 control (without Nb, c,d) and with addition of nanobody (e,f) for GFP-LYPD6 (top panels) and GPI-EGFP  
253 (bottom panels).

254 An explanation for these observations could be that the (E)GFP tagged proteins appear to a certain  
255 extent in aggregates or homo-oligomers that are (partially) disassembled after Nb binding, leading  
256 to an average increase in fluorescent particle number (Figures 2 and 3) and mobility (Figure 3 and  
257 4) without majorly affecting the fluorescence lifetime (Supplementary Figure S2). GPI-EGFP  
258 dimers have been reported previously (Huang et al., 2015; Suzuki et al., 2012). However, since

259 aggregates should in principle be brighter, one would in this case expect a decrease in molecular  
260 fluorescence brightness (cpm) upon aggregate disassembly. Our opposite observation indicates  
261 that the aggregates might actually be darker, e.g. due to self-quenching processes, and their fraction  
262 is rather low after disassembly. This is illustrated by the bi-variate histograms of cpm and  $\tau_D$   
263 (Figure 4c-f); the fraction of darker and slower molecules (“tail” of the distribution in Figure 4c,d)  
264 is notably reduced in the presence of nanobody (Figure 4e,f). If this is indeed the case, it is essential  
265 to know whether Nb binds to both oligo- and monomers with different affinity or selectively to  
266 one class.

### 267 *Diffusion of labelled nanobodies*

268 To address what species is bound by the nanobody, we compared sFCS and FCS data of  
269 fluorescently labelled Nb and GFP-LYPD6 or GPI-EGFP at the plasma membrane of live PtK2  
270 cells. Specifically, we employed Nbs tagged with the red-emitting dye Abberior Star 635P  
271 (AbStar635P-Nb), whose fluorescence emission was clearly distinguishable from that of the  
272 fluorescent proteins and detected on a separate detector. First, using confocal imaging we  
273 confirmed that the AbStar635-Nb bound only to the surface transfected cells and not to those  
274 without e.g. GPI-EGFP, i.e. AbStar635-Nb specifically interacted with the fluorescent protein on  
275 the membrane only (Supplementary Figure S3). Second, we also found an increase in mobility (i.e.  
276 decrease in average transit time  $\tau_D$ ) and increase in brightness cpm of the EGFP tagged proteins  
277 upon AbStar635-Nb binding, i.e. the label did not influence this effect (Figure 5a,b and  
278 Supplementary Figure S4). Interestingly, simultaneously recorded sFCS data for AbStar635P-Nb  
279 and GPI-EGFP (Figure 5c,d) revealed a profoundly slower diffusion for AbStar635P-Nb compared  
280 to the EGFP-tagged proteins. We observed an average transit time of  $\tau_D = 28.3 \text{ ms} \pm 1.0$  ( $D = 0.5$   
281  $\pm 0.02 \text{ } \mu\text{m}^2/\text{s}$ ) for AbStar635P-Nb and  $\tau_D = 10.3 \text{ ms} \pm 1.0$  ( $D = 1.2 \pm 0.12 \text{ } \mu\text{m}^2/\text{s}$ ) for GPI-EGFP  
282 (Figure 5a-d). This is an obvious contradiction, as the Nbs should be bound directly to the surface  
283 proteins (GPI-EGFP) but moved significantly slower than the protein itself. A possible explanation  
284 for this contradiction extends our previous hypothesis and points to the existence of two pools of  
285 (E)GFP on the cell surface; a darker oligomeric form that diffuses slowly and to which the Nb  
286 preferentially binds, which would drive the partial displacement of brighter and faster moving  
287 monomers, to which Nb does not bind efficiently.

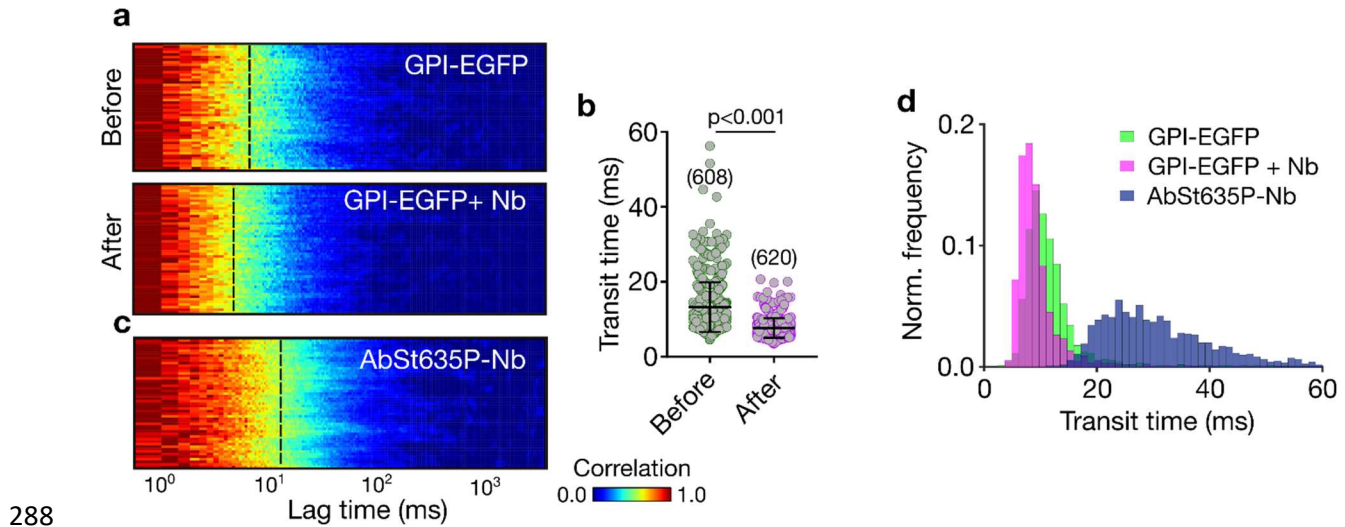

289 **Figure 5 Diffusion of labelled Nb (AbStar635P-Nb) on GPI-EGFP expressing PtK2 cells.** a,b)  
290 Representative normalised sFCS autocorrelation carpets for (a) GPI-EGFP before and after addition of  
291 AbStar635P-Nb (x: correlation lag time, y: line pixels (space), colour scale: normalised correlation from  
292 zero (blue) to one (red)), revealing a shift of the decay of the correlation curves (yellow region, average  
293 transit time highlighted by the dashed line) towards shorter times after addition of labelled Nb. b)  $\tau_D$  values  
294 for GPI-EGFP before and after AbStar635P-Nb addition including mean values and standard deviations. c)  
295 Normalised autocorrelation carpet for AbStar635P-Nb bound to PTK2 cells expressing GPI-EGFP. d)  
296 Histogram of  $\tau_D$  for GPI-EGFP (with and without Nb) and AbStar635P-Nb. The p-value given in panel b  
297 was calculated using the Kolmogorov–Smirnov non-parametric test.

### 298 *Missing co-diffusion of (E)GFP and nanobodies*

299 To investigate these indications further, we applied fluorescence cross correlation spectroscopy  
300 (FCCS (Schwille et al., 1997)). Based on the principle of FCS, FCCS takes information from the  
301 temporal cross-correlation function of two simultaneously recorded fluorescence signal time traces  
302 of two distinctively labelled and emitting (e.g. green and red fluorescence, respectively) diffusing  
303 molecules to determine the degree of co-diffusion or interaction of the two molecules. Only when  
304 molecules show co-diffusion or interaction, the amplitude of the cross-correlation curve is larger  
305 than zero. An FCCS amplitude of zero indicates the absence of co-diffusion of the two fluorescing  
306 molecules (Bacia and Schwille, 2007). Therefore, the AbStar635P-Nb binding to fluorescently  
307 tagged GPI-APs should be a perfect sample for FCCS analysis, since every (red-emitting) Nb  
308 molecule should be bound to a (green-emitting) (E)GFP, yielding in theory a perfect cross-  
309 correlation between the red and green fluorescence signals. Performance of our FCCS experiments



310 was validated through a positive control (red-labelled peptide binding specifically to membrane-  
311 embedded green-emitting cholesterol analogue, Supplementary Figure S5), showing a large non-  
312 zero FCCS amplitude, confirming near-perfect co-diffusion. Strikingly, we did not observe any  
313 notable cross-correlation and therefore no co-diffusion between AbStar635P-Nb and (E)GFP-  
314 tagged molecules anchored to the plasma membrane, as shown for GPI-EGFP in Figure 6a. The  
315 absence of co-diffusion is also illustrated by the dual-colour intensity time trace (Figure 6b)  
316 demonstrating only very rare detection events with signal from both channels, i.e. EGFP and  
317 AbStar635P-Nb independently crossed the observation spot. Following the same strategy as  
318 before, we used sFCS to confirm these findings for GFP-LYPD6, employing higher statistical  
319 throughput and spatial sampling. The auto-correlation carpets (Figure 6c,d) reveal the same slower  
320 diffusion of the bound AbStar635P-Nb compared to the binding partner GFP-LYPD6, as was the  
321 case for the experiments with GPI-EGFP (Figure 5 a,c). Similarly the scanning cross-correlation  
322 data of AbStar635P-Nb and GFP-LYPD6 confirmed the complete absence of co-diffusion of  
323 fluorescing binding partners and in contrast to a positive control (Supplementary Figure S6), we  
324 only observed noise (Figure 6e). We can only conclude that the Nbs do not bind the bright and fast  
325 diffusing (E)GFP-tagged proteins (supposedly monomers), but predominantly to a dark and slowly  
326 diffusing entity (supposedly oligomers).

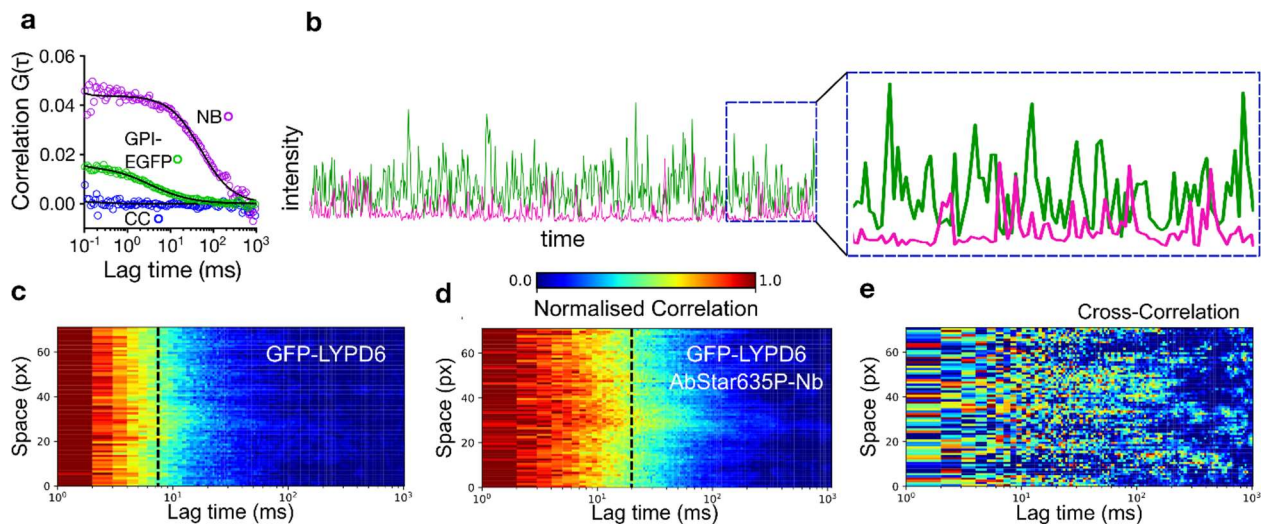

327

328 **Figure 6 Missing co-diffusion of labelled Nb and (E)GFP-tagged surface proteins.** PtK2 cells  
329 expressing GPI-EGFP or GFP-LYPD6 were treated with labelled Nb (AbStar635P-Nb) and FCCS data  
330 acquired. Positive cross correlation (CC) indicates interaction, i.e. co-diffusion. a) point FCCS of GPI-  
331 EGFP with autocorrelation EGFP (green), autocorrelation Nb (labelled with AbberiorStar635P, magenta)

332 and CC (blue). b) Representative dual-colour intensity trace showing that the detection events for EGFP  
333 and AbStar635P-Nb rarely overlap in time. c-e) scanning FCCS data of GFP-LYPD6 expressed on the  
334 surface of PtK2 cells, with representative normalised auto-correlation data for (c) GFP-LYPD6, (d)  
335 AbStar635P-Nb and (e) normalised cross-correlation data of those. The dashed black line indicates the  
336 average transit times. The temporal cross-correlation of these two dataset does not show any positive cross-  
337 correlation, i.e. no co-diffusion.

338

339 Other reasons for the absence of cross-correlation could be *i)* very fast binding kinetics (i.e. on-  
340 and off-rates) of the Nb-(E)GFP interaction or *ii)* too low binding leaving too many unbound  
341 (E)GFP molecules. However, our data do not support these scenarios. 1) We determined off-rates,  
342  $k_{\text{off}}$ , for the Nb-GFP binding using surface plasmon resonance (SPR) experiments (of GFP binding  
343 to surface-immobilised (labelled and unlabelled) Nbs), resulting in  $k_{\text{off}} \approx 5 \times 10^{-4} \text{ s}^{-1}$   
344 (Supplementary Figure S7). Consequently, the Nb-(E)GFP complex is stable for about 30 minutes,  
345 which is in agreement with previous data (Della Pia and Martinez, 2015). During the 1-50  
346 milliseconds long transit through the observation spot, the Nb-(E)GFP complex should be intact.  
347 This data rules out fast kinetics. 2) We also recorded FCCS data in large excess of AbStar635-Nb,  
348 saturating GFP binding. However, we still did not observe any cross-correlation (Supplementary  
349 Figure S8). This data rules out the domination of unbound particles.

350 We also tested whether the lack of cross-correlation signal could be dye-specific for AbStar635P,  
351 but cross-correlation was also absent when performing the same sFCCS experiments as before  
352 with nanobody labelled with the dye Atto594 (Supplementary Figure S9).

353 Another possible explanation for the lack of co-diffusion might be an extremely efficient (close to  
354 100%) energy transfer (Sun et al., 2011) between the fluorescent protein(s) and the AbStar635-  
355 Nb. Such a Förster resonance energy transfer (FRET) would render the Nb-bound fluorescent  
356 proteins very dim and therefore hardly visible for FCCS analysis (FCS-based experiments require  
357 rather large fluorescence brightness (Saffarian and Elson, 2003; Schneider et al., 2020)). Several  
358 observations oppose this scenario: *i)* Close to 100% FRET efficiency should lead to a huge  
359 decrease in the number  $N$  of visible donor (E)GFP molecules and thus a decrease of EGFP  
360 fluorescence intensity with nanobody binding, which is not the case (Figure 1, 2 and  
361 Supplementary Figure S10). *ii)* A large energy transfer generally leads to a vast decrease in the



362 fluorescence lifetime of the FRET donor, in this case (E)GFP. We therefore measured and  
363 compared values of the fluorescence lifetime for GFP and EGFP with and without binding to  
364 unlabelled and AbStar635P-labelled Nb. There was a small reduction in fluorescence lifetime for  
365 GFP ( $\approx 3$  ns to  $\approx 2.2$  ns) and EGFP ( $\approx 2.6$  ns to  $\approx 2.1$  ns) in solution (Supplementary Figure S11),  
366 indicating only a minor influence by FRET and not explaining the complete lack of cross-  
367 correlating fluorescence signal. Some FRET may explain though the lower increase in  
368 fluorescence intensity upon labelled nanobody binding to the recombinant proteins in solution  
369 (Supplementary Figure 12) compared to unlabelled Nb (Figure 1). iii) The molecular fluorescence  
370 brightness cpm of the donor EGFP molecules should go down after addition of labelled compared  
371 to unlabelled Nbs. As highlighted before, we however see an increase in cpm values independent  
372 of labelled or unlabelled Nb (Figure 4c-f and Supplementary Figure S4).

### 373 **Conclusions**

374 The use of Nbs, not only as an alternative for full-length antibodies, presents a versatile new route  
375 for detection and manipulation of proteins in biology and especially microscopy (Beghein and  
376 Gettemans, 2017). Their small size, monovalancy, the ability to label them stoichiometrically, and  
377 their recombinant or even in vivo production makes them an attractive tool (Bothma et al., 2018;  
378 Großmayer et al., 2014; Sograte-Idrissi et al., 2020). The GFP-binding Nbs along with Nbs against  
379 other fluorescent proteins enable conveniently to perform super-resolution microscopy on the  
380 tagged protein of interest (Platonova et al., 2015; Ries et al., 2012; Sograte-Idrissi et al., 2019). A  
381 modulation of the GFP's spectral properties by interaction with Nbs has been shown and exploited  
382 before (Bothma et al., 2018; Kirchhofer et al., 2010), however the Nb has not been implicated in  
383 the reorganisation of the tagged protein.

384 In this study, we used imaging and spectroscopic techniques to investigate changes in the dynamic  
385 organisation of (E)GFP tagged lipid anchors in model membranes and living cells upon binding  
386 of labelled and unlabelled anti-GFP nanobody. Overall, our data show that (i) Nb increases the  
387 apparent number of GFP molecules on GUVs and cells, (ii) Nb binding to fluorescent proteins on  
388 living cells increases the mobility of GPI-anchored EGFP or GFP, (iii) the Nb diffuses slowly  
389 compared to the GFP on living cells, which means that they do not co-diffuse, and (iv) the Nb  
390 binding modulates photophysical properties of the fluorescent proteins. These findings may  
391 suggest that the Nbs bind predominantly to an already existing dark form of the (E)GFP, which

392 might be a slow-moving, higher order complex. Lack of co-diffusion suggests that this complex is  
393 not strongly fluorescent (e.g., due to self-quenching) but still primarily recognized by the Nb. Upon  
394 binding, Nb could partially disassemble the dark complex and release a few molecules from the  
395 complex that become fluorescent but are not bound to a Nb. Although this process still needs to  
396 be directly shown in the future, our results imply that the Nb binding could influence the  
397 organization of the GFP-tagged proteins in living cells. It has been reported before that Nb binding  
398 could perturb protein function (Küey et al., 2019). Consequently, when performing conventional  
399 or super-resolved imaging using anti-GFP nanobodies to label (E)GFP conjugated proteins, the  
400 measurements need to be interpreted with care, especially on live cells and when quantitative data  
401 on dynamics are derived.

402 We only showed the effect of GFP-nanobodies, thus we refrain ourselves from generalizing the  
403 effect to all nanobodies. Recently, by using SNAP-25 and Syntaxin 1A nanobodies, a previously  
404 undetected pool of synaptic population were found in the cells (Maidorn et al., 2019), which was  
405 attributed to nanobodies' ability to reveal different organization patterns. Therefore, there is a  
406 possibility that the effect of nanobodies could be more general. Moreover, here we only test  
407 nanobodies against GFP proteins (in model membranes) or GFP-labelled GPI-anchored proteins,  
408 but it seems probable that the effect will be similar on other proteins labelled with GFP or its  
409 derivatives as the modulating interactions are between the fluorescent protein and the nanobody.

## 410 **Significance**

411 Nanobodies, especially against fluorescent proteins, are widely used in microscopy to investigate  
412 the organisation of recombinantly tagged proteins. Usually, the fluorescent label on the nanobody  
413 is imaged as proxy for the organisation of the protein of interest. Here, by applying imaging and  
414 single molecule fluorescence spectroscopy, we show that in live cells, the distribution and  
415 dynamics of nanobody and target protein of interest may differ. We used GPI-anchored proteins  
416 as an example and illustrate that the nanobody bound to GPI-EGFP did not accurately resemble  
417 the native organisation of the protein and may even change it. Since nanobodies are constantly  
418 becoming more popular, our findings are crucial as they suggest that it is necessary to exercise  
419 prudence when applying nanobodies for quantitative analysis of live-cell microscopy.

## 420 **Acknowledgements**

421 We thank the EMBL Super-resolution course, Dr. Marco Lampe and Dr. Jonas Ries for their help  
422 on emergence of this interesting question, Dr. Chris Paluch for his help on Biacore SPR analysis.  
423 We also thank Christoffer Lagerholm and the Wolfson Imaging Centre Oxford and the Micron  
424 Advanced Bioimaging Unit (Wellcome Trust Strategic Award 091911) for providing microscope  
425 facility and financial support. We acknowledge funding by the Wolfson Foundation, the Medical  
426 Research Council (MRC, grant number MC\_UU\_12010/unit programmes G0902418 and  
427 MC\_UU\_12025), MRC/BBSRC/EPSRC (grant number MR/K01577X/1), the Wellcome Trust  
428 (grant ref 104924/14/Z/14), the Deutsche Forschungsgemeinschaft (Research unit 1905 “Structure  
429 and function of the peroxisomal translocon”, Jena Excellence Cluster "Balance of the Microverse",  
430 Collaborative Research Center 1278 "Polytarget"), Oxford-internal funds (John Fell Fund and  
431 EPA Cephalosporin Fund) and Wellcome Institutional Strategic Support Fund (ISSF). ES is  
432 funded by the Newton-Katip Celebi Institutional Links grant (352333122) and SciLifeLab  
433 fellowship.

#### 434 **Author contributions**

435 F.S. and E.S. designed the study, performed the experiments and analysed the data. F.S., E.S. and  
436 C.E. wrote the manuscript.

#### 437 **Declaration of interest**

438 The authors declare no conflict of interest

#### 439 **Materials and Methods**

##### 440 *Cell culture & labelling*

441 PtK2 cells were cultured at 37 °C, 5 % CO<sub>2</sub>, in DMEM (Sigma Aldrich) supplemented with 16%  
442 FBS (Sigma Aldrich). For microscopy the cells were seeded on 25 mm diameter glass coverslips  
443 (#1.5 thickness). Transfections of GPI-EGFP (kind gift from Kai Simon’s lab) and GFP-LYPD6  
444 (Özhan et al., 2013) were performed with Lipofectamine 3000 (Thermo Fisher) according to the  
445 manufacturer’s protocol.

446 While imaging cells at 37 °C, they were incubated with unlabelled (GFP-binding protein,  
447 Chromotek) and Abberior 635P conjugated Nanobody (GFP-booster, Chromotek). All

448 experiments were performed in L15 imaging medium (Sigma Aldrich) and the nanobody added to  
449 1 mL and well mixed.

#### 450 *GUVs*

451 GUVs were prepared using electro-formation as described in(Jenkins et al., 2019). Lipid mixture  
452 (1mg/mL DOPC:DGS-Ni-NTA (both obtained from Avanti Polar Lipids) 96:4 molar ratio) were  
453 spread on platinum wire and dipped into 300 mM sucrose. GUVs formed after exposure to an AC  
454 field of 2 V and 10 Hz for 1 h followed by 2 V 2 Hz for another 30 minutes. His-tagged GFP (Sino  
455 Biological) and eGFP (OriGene) was incubated for 20 minutes with the vesicles before imaging  
456 and FCS was performed.

#### 457 *Confocal microscopy & FCS*

458 Confocal microscopy and FCS were performed on a Zeiss780 and Zeiss880 both equipped with  
459 an Argon laser for fluorescence excitation. All sFCS and most imaging has been performed in  
460 photon counting mode using Channel S. To excite the labelled nanobody the HeNe 633 excitation  
461 has been employed. For single colour FCS and imaging a 488 dichroic mirror and for two-colour  
462 imaging a 488/561/633 MBS was used. The fluorescence was collected between 500 nm and 600  
463 nm for the green channel and between 640 nm and 695 nm for the red channel. Laser powers were  
464 between 1 and 5  $\mu$ W and kept below saturation to avoid artefacts in FCS.

465 The images were processed using FIJI (Rueden et al., 2017; Schindelin et al., 2012). The plasma  
466 membranes of each cell was segmented out using the polygon selection tool. Similar sized regions  
467 of interest were generated for the background. The average intensities over time for the whole area  
468 were extracted from the z-profile.

469 Point-FCS measurements were performed using Zeiss' internal FCS routine. Measurements were  
470 between 10 and 15 seconds long. The objective's correction collar was adjusted and the pinhole  
471 aligned measuring the diffusion of Alexa Fluor 488 in water. FCS measurements were saved as  
472 .fcs files for fitting. The same procedure was followed for cross-correlation (FCCS) measurements  
473 but additionally using a cross-correlation positive control (Bodipy and Alexa647 labelled HDL  
474 particles (Plochberger et al., 2017)) to ensure optical alignment.

475 sFCS measurements were performed as xt scans. 52 pixels were acquired for  $10^5$  lines at about  
476 2000 Hz yielding pixel dwell time of 3.94  $\mu$ s (overall resulting in a total acquisition time of about  
477 47 seconds). The data were saved as .lsm5 file and externally correlated using the FoCuS\_scan  
478 software package (Waithe et al., 2018). To correct for photobleaching, the first seconds were  
479 cropped off and a local averaging bleaching-correction applied as described in (Waithe et al.,  
480 2018). sFCCS measurements were performed in a similar manner using the described acquisition  
481 settings in conjunction with the optical set-up for two-colour imaging as described above. As a  
482 positive control for sFCCS, we used a sparse sample of DOPC (1,2-dioleoyl-sn-glycero-3-  
483 phosphocholine), Avanti Polar Lipids) vesicles doped 1:50,000 with DiO (Invitrogen) and  
484 1:10,000 with AbberiorSTAR-Red-PEG-Cholesterol (Abberior). The sample was prepared by  
485 mixing the lipid and dyes in ethanol, drying the mixture, and re-suspending the lipid film by  
486 vortexing and ultra-sonication (5 minutes and 30 minutes, respectively) in water. Measurements  
487 were performed in PBS.

488 Point and sFCS data were fitted in FoCuS (Waithe et al., 2016, 2018). Point-FCS data showed a  
489 contribution of a triplet component (40  $\mu$ s for (E)GFP (Schneider et al., 2020)), a fast (probably  
490 cytoplasmic) component, with transit times around 0.1 ms, and a slower transit time which was  
491 attributed to the diffusion in the membrane. Thus, pFCS data were fitted with a two component  
492 diffusion model including a triplet state (Widengren et al., 1995). sFCS acquisitions miss the fast  
493 dynamics and were fitted with a single component 2D diffusion model (Schneider et al., 2018).  
494 Fitting in FoCuS is performed using a Levenberg-Marquard non-linear least square optimisation.  
495 The fitted parameters including the cpms (determined from fitted amplitude and the average count  
496 rate) were exported as Excel sheets and post processed with Matlab (Schneider et al., 2018).

497 Some data on mobility were acquired cell by cell to account for the inherent biological  
498 heterogeneity. In these cases only the ratio of the transit times, number of molecules or counts per  
499 molecule before and after addition of the nanobody are reported (After/Before). Statistical tests  
500 were performed in GraphPad Prism 8. We employed the Wilcoxon sign-rank non-parametric tests  
501 with hypothetical median values of 1 for the data presented as ratios and we used the Kolmogorov–  
502 Smirnov non-parametric test for all other data.

503 *Lifetime measurements*

504 Life time imaging was performed on a Microtime 200 (PicoQuant) equipped with a FlimBee galvo  
505 scanner. Fluorescence was excited with a 488 nm diode laser (PicoQuant) and focused onto the  
506 sample with an Olympus UPlanSApo 60 x water-immersion objective. Images were acquired as  
507 50 by 50  $\mu\text{m}^2$  (512 by 512 pixel) for collecting the fluorescence for 60 s at low excitation power  
508 ( $<1 \mu\text{W}$ ) to avoid too high count rates and distortion of the TCSPC data (Isbaner et al., 2016). The  
509 overall TCSPC curves were used for lifetime fitting (2 component tail fit, second component fixed  
510 to 4.1 ns). We report the amplitude weighted lifetime of GPI-eGFP and GFP-LYPD6 in the plasma  
511 membrane of living PtK2 cells.

512 The same set-up was used to measure the fluorescent lifetime of GFP-His and EGFP-His in  
513 solution. The data were acquired as point scans.

#### 514 *SPR*

515 We immobilised the nanobodies (either fluorescently labelled or unlabelled) by amine coupling to  
516 a CM5 chip (with an RFPNB in the reference channel) then injected GFP as the analyte in a kinetic  
517 analysis (a single injection at 87 nM, using curve fitting in the BiaEvaluation software to measure  
518 on and off rates from which the  $K_D$  is calculated).

#### 519 *Spectra*

520 All spectral measurements were performed using a CLARIO STAR plate reader (BMG  
521 LABTECH). His-tagged GFP and EGFP were measured in PBS in glass bottom 96-well plates  
522 (Porvair Sciences) which were prior to the measurements coated with BSA to prevent sticking of  
523 the fluorescent proteins to the glass. All spectra are averages of multiple wells. Excitation scan  
524 were performed with a readout at 510 nm and emission scans were performed with excitation at  
525 405 nm or 488 nm. We choose a spectral resolution of 1 nm and used 200 flashes per wavelength  
526 for averaging.

## 527 **References**

- 528 Aguilar, G., Matsuda, S., Vigano, M.A., and Affolter, M. (2019). Using Nanobodies to Study  
529 Protein Function in Developing Organisms. *Antibodies* 8, 16.
- 530 Arbabi Ghahroudi, M., Desmyter, A., Wyns, L., Hamers, R., and Muyldermans, S. (1997).  
531 Selection and identification of single domain antibody fragments from camel heavy-chain  
532 antibodies. *FEBS Lett.* 414, 521–526.
- 533 Bacia, K., and Schwille, P. (2007). Practical guidelines for dual-color fluorescence cross-  
534 correlation spectroscopy. *Nat. Protoc.* 2, 2842–2856.
- 535 Baumgart, F., Arnold, A.M., Leskovar, K., Staszek, K., Fölser, M., Weghuber, J., Stockinger, H.,  
536 and Schütz, G.J. (2016). Varying label density allows artifact-free analysis of membrane-protein  
537 nanoclusters. *Nat. Methods* 2, 0–10.
- 538 Beghein, E., and Gettemans, J. (2017). Nanobody Technology: A Versatile Toolkit for  
539 Microscopic Imaging, Protein–Protein Interaction Analysis, and Protein Function Exploration.  
540 *Front. Immunol.* 8, 1–14.
- 541 Bothma, J.P., Norstad, M.R., Alamos, S., and Garcia, H.G. (2018). LlamaTags: A Versatile Tool  
542 to Image Transcription Factor Dynamics in Live Embryos. *Cell* 173, 1810-1822.e16.
- 543 Braun, M.B., Traenkle, B., Koch, P.A., Emele, F., Weiss, F., Poetz, O., Stehle, T., and  
544 Rothbauer, U. (2016). Peptides in headlock - A novel high-affinity and versatile peptide-binding  
545 nanobody for proteomics and microscopy. *Sci. Rep.* 6, 1–10.
- 546 Buser, D.P., Schleicher, K.D., Prescianotto-Baschong, C., and Spiess, M. (2018). A versatile  
547 nanobody-based toolkit to analyze retrograde transport from the cell surface. *Proc. Natl. Acad.*  
548 *Sci. U. S. A.* 115, E6227–E6236.
- 549 Cao, J., Zhong, N., Wang, G., Wang, M., Zhang, B., Fu, B., Wang, Y., Zhang, T., Zhang, Y.,  
550 Yang, K., et al. (2019). Nanobody-based sandwich reporter system for living cell sensing  
551 influenza A virus infection. *Sci. Rep.* 9, 15899.
- 552 Carrington, G., Tomlinson, D., and Peckham, M. (2019). Exploiting nanobodies and Affimers  
553 for superresolution imaging in light microscopy. *Mol. Biol. Cell* 30, 2737–2740.
- 554 Chattoraj, M., King, B.A., Bublitz, G.U., and Boxer, S.G. (1996). Ultra-fast excited state  
555 dynamics in green fluorescent protein: multiple states and proton transfer. *Proc. Natl. Acad. Sci.*  
556 93, 8362–8367.
- 557 Chojnacki, J., Waithe, D., Carravilla, P., Huarte, N., Galiani, S., Enderlein, J., and Eggeling, C.  
558 (2017). Envelope glycoprotein mobility on HIV-1 particles depends on the virus maturation  
559 state. *Nat. Commun.* 8, 545.
- 560 Chudakov, D.M., and Lukyanov, K.A. (2003). Use of Green Fluorescent Protein (GFP) and Its  
561 Homologs for in vivo Protein Motility Studies. *Biochem.* 68, 952–957.
- 562 Conyard, J., Kondo, M., Heisler, I.A., Jones, G., Baldrige, A., Tolbert, L.M., Solntsev, K.M.,  
563 and Meech, S.R. (2011). Chemically modulating the photophysics of the GFP chromophore. *J.*  
564 *Phys. Chem. B* 115, 1571–1577.



- 565 Eggeling, C., Ringemann, C., Medda, R., Schwarzmann, G., Sandhoff, K., Polyakova, S., Belov,  
566 V.N., Hein, B., von Middendorff, C., Schönle, A., et al. (2009). Direct observation of the  
567 nanoscale dynamics of membrane lipids in a living cell. *Nature* *457*, 1159–1162.
- 568 Fabricius, V., Lefèbre, J., Geertsema, H., Marino, S.F., and Ewers, H. (2018). Rapid and efficient  
569 C-terminal labeling of nanobodies for DNA-PAINT. *J. Phys. D. Appl. Phys.* *51*.
- 570 Farrants, H., Tarnawski, M., Müller, T.G., Otsuka, S., Hiblot, J., Koch, B., Kueblbeck, M.,  
571 Kräusslich, H.-G., Ellenberg, J., and Johnsson, K. (2020). Chemogenetic Control of Nanobodies.  
572 *Nat. Methods* 683557.
- 573 Ghosh, A., Isbaner, S., Veiga Gutierrez, M., Gregor, I., Enderlein, J., and Karedla, N. (2017).  
574 Quantifying Microsecond Transition Times Using Fluorescence Lifetime Correlation  
575 Spectroscopy. *J. Phys. Chem. Lett.* *acs.jpcllett.7b02707*.
- 576 Goswami, D., Gowrishankar, K., Bilgrami, S., Ghosh, S., Raghupathy, R., Chadda, R.,  
577 Vishwakarma, R., Rao, M., and Mayor, S. (2008). Nanoclusters of GPI-Anchored Proteins Are  
578 Formed by Cortical Actin-Driven Activity. *Cell* *135*, 1085–1097.
- 579 Größmayer, K.S., Kurz, A., and Hertel, D.P. (2014). Single-molecule studies on the label  
580 number distribution of fluorescent markers. *ChemPhysChem* *15*, 734–742.
- 581 Harmsen, M.M., and De Haard, H.J. (2007). Properties, production, and applications of camelid  
582 single-domain antibody fragments. *Appl. Microbiol. Biotechnol.* *77*, 13–22.
- 583 Huang, H., Simsek, M.F., Jin, W., and Pralle, A. (2015). Effect of receptor dimerization on  
584 membrane lipid raft structure continuously quantified on single cells by camera based  
585 fluorescence correlation spectroscopy. *PLoS One* *10*, 1–18.
- 586 Isbaner, S., Karedla, N., Ruhlandt, D., Stein, S.C., Chizhik, A., Gregor, I., and Enderlein, J.  
587 (2016). Dead-time correction of fluorescence lifetime measurements and fluorescence lifetime  
588 imaging. *Opt. Express* *24*, 9429–9445.
- 589 Jenkins, E., Santos, A.M., O’Brien-Ball, C., Felce, J.H., Wilcock, M.J., Hatherley, D., Dustin,  
590 M.L., Davis, S.J., Eggeling, C., and Sezgin, E. (2019). Reconstitution of immune cell  
591 interactions in free-standing membranes. *J. Cell Sci.* *132*, jcs219709.
- 592 Jullien, D., Vignard, J., Fedor, Y., Béry, N., Olichon, A., Crozatier, M., Erard, M., Cassard, H.,  
593 Ducommun, B., Salles, B., et al. (2016). Chromatibody, a novel non-invasive molecular tool to  
594 explore and manipulate chromatin in living cells. *J. Cell Sci.* *129*, 2673–2683.
- 595 Jung, G., Wiehler, J., and Zumbusch, A. (2005). The photophysics of green fluorescent protein:  
596 Influence of the key amino acids at positions 65, 203, and 222. *Biophys. J.* *88*, 1932–1947.
- 597 Kirchhofer, A., Helma, J., Schmidhals, K., Frauer, C., Cui, S., Karcher, A., Pellis, M.,  
598 Muyldermans, S., Casas-Delucchi, C.S., Cardoso, M.C., et al. (2010). Modulation of protein  
599 properties in living cells using nanobodies. *Nat. Struct. Mol. Biol.* *17*, 133–138.
- 600 Klamecka, K., Severin, P.M., Milles, L.F., Gaub, H.E., and Leonhardt, H. (2015). Energy profile  
601 of nanobody–GFP complex under force. *Phys. Biol.* *12*, 056009.
- 602 Küey, C., Larocque, G., Clarke, N.I., and Royle, S.J. (2019). Unintended perturbation of protein

- 603 function using GFP nanobodies in human cells. *J. Cell Sci.* *132*, jcs234955.
- 604 Lenne, P.-F., Wawrezynieck, L., Conchonaud, F., Wurtz, O., Boned, A., Guo, X.-J., Rigneault,  
605 H., He, H.-T., and Marguet, D. (2006). Dynamic molecular confinement in the plasma membrane  
606 by microdomains and the cytoskeleton meshwork. *EMBO J.* *25*, 3245–3256.
- 607 Leslie, M. (2018). Small but mighty. *Science* (80-. ). *360*, 594–597.
- 608 Lippincott-Schwartz, J., and Patterson, G.H. (2009). Photoactivatable fluorescent proteins for  
609 diffraction-limited and super-resolution imaging. *Trends Cell Biol.* *19*, 555–565.
- 610 Maidorn, M., Olichon, A., Rizzoli, S.O., and Opazo, F. (2019). Nanobodies reveal an extra-  
611 synaptic population of SNAP-25 and Syntaxin 1A in hippocampal neurons. *MABs* *11*, 305–321.
- 612 Maier, J., Traenkle, B., and Rothbauer, U. (2015). Real-time analysis of epithelial-mesenchymal  
613 transition using fluorescent single-domain antibodies. *Sci. Rep.* *5*, 1–13.
- 614 Mikhaylova, M., Cloin, B.M.C., Finan, K., Van Den Berg, R., Teeuw, J., Kijanka, M.M.,  
615 Sokolowski, M., Katrukha, E.A., Maidorn, M., Opazo, F., et al. (2015). Resolving bundled  
616 microtubules using anti-tubulin nanobodies. *Nat. Commun.* *6*.
- 617 Niwa, H., Inouye, S., Hirano, T., Matsuno, T., Kojima, S., Kubota, M., Ohashi, M., and Tsuji,  
618 F.I. (1996). Chemical nature of the light emitter of the *Aequorea* green fluorescent protein. *Proc.*  
619 *Natl. Acad. Sci. U. S. A.* *93*, 13617–13622.
- 620 Özhan, G., Sezgin, E., Wehner, D., Pfister, A.S., Kühl, S.J., Kagermeier-Schenk, B., Kühl, M.,  
621 Schwille, P., and Weidinger, G. (2013). Lypd6 Enhances Wnt/ $\beta$ -Catenin Signaling by Promoting  
622 Lrp6 Phosphorylation in Raft Plasma Membrane Domains. *Dev. Cell* *26*, 331–345.
- 623 Pereira, P.M., Albrecht, D., Culley, S., Jacobs, C., Marsh, M., Mercer, J., and Henriques, R.  
624 (2019). Fix Your Membrane Receptor Imaging: Actin Cytoskeleton and CD4 Membrane  
625 Organization Disruption by Chemical Fixation. *Front. Immunol.* *10*, 675.
- 626 Della Pia, E.A., and Martinez, K.L. (2015). Single domain antibodies as a powerful tool for high  
627 quality surface plasmon resonance studies. *PLoS One* *10*, 1–17.
- 628 Pinkwart, K., Schneider, F., Lukoseviciute, M., Sauka-Spengler, T., Lyman, E., Eggeling, C.,  
629 and Sezgin, E. (2019). Nanoscale dynamics of cholesterol in the cell membrane. *J. Biol. Chem.*  
630 *294*, 12599–12609.
- 631 Platonova, E., Winterflood, C.M., Junemann, A., Albrecht, D., Faix, J., and Ewers, H. (2015).  
632 Single-molecule microscopy of molecules tagged with GFP or RFP derivatives in mammalian  
633 cells using nanobody binders. *Methods* *88*, 89–97.
- 634 Pleiner, T., Bates, M., Trakhanov, S., Lee, C.T., Schliep, J.E., Chug, H., Böhning, M., Stark, H.,  
635 Urlaub, H., and Görlich, D. (2015). Nanobodies: Site-specific labeling for super-resolution  
636 imaging, rapid epitope- mapping and native protein complex isolation. *Elife* *4*, 1–21.
- 637 Pleiner, T., Bates, M., and Görlich, D. (2018). A toolbox of anti-mouse and anti-rabbit IgG  
638 secondary nanobodies. *J. Cell Biol.* *217*, 1143–1154.
- 639 Plochberger, B., Röhrle, C., Preiner, J., Rankl, C., Brameshuber, M., Madl, J., Bittman, R., Ros,  
640 R., Sezgin, E., Eggeling, C., et al. (2017). HDL particles incorporate into lipid bilayers – a

- 641 combined AFM and single molecule fluorescence microscopy study. *Sci. Rep.* 7, 15886.
- 642 Ries, J., Kaplan, C., Platonova, E., Eghlidi, H., and Ewers, H. (2012). A simple, versatile method  
643 for GFP-based super-resolution microscopy via nanobodies. *Nat. Methods* 9, 582–584.
- 644 Rueden, C.T., Schindelin, J., Hiner, M.C., DeZonia, B.E., Walter, A.E., Arena, E.T., and Eliceiri,  
645 K.W. (2017). ImageJ2: ImageJ for the next generation of scientific image data. *BMC*  
646 *Bioinformatics* 18, 529.
- 647 Saffarian, S., and Elson, E.L. (2003). Statistical analysis of fluorescence correlation  
648 spectroscopy: The standard deviation and bias. *Biophys. J.* 84, 2030–2042.
- 649 Saffman, P.G., and Delbrück, M. (1975). Brownian motion in biological membranes. *Proc. Natl.*  
650 *Acad. Sci. U. S. A.* 72, 3111–3113.
- 651 Saha, S., Lee, I.-H., Polley, A., Groves, J.T., Rao, M., and Mayor, S. (2015). Diffusion of GPI-  
652 anchored proteins is influenced by the activity of dynamic cortical actin. *Mol. Biol. Cell* 26,  
653 4033–4045.
- 654 Sahl, S.J., Hell, S.W., and Jakobs, S. (2017). Fluorescence nanoscopy in cell biology. *Nat. Rev.*  
655 *Mol. Cell Biol.* 18, 685–701.
- 656 Schindelin, J., Arganda-Carreras, I., Frise, E., Kaynig, V., Longair, M., Pietzsch, T., Preibisch,  
657 S., Rueden, C., Saalfeld, S., Schmid, B., et al. (2012). Fiji: an open-source platform for  
658 biological-image analysis. *Nat. Methods* 9, 676–682.
- 659 Schneider, F., Waithe, D., Clausen, M.P., Galiani, S., Koller, T., Ozhan, G., Eggeling, C., and  
660 Sezgin, E. (2017). Diffusion of lipids and GPI-anchored proteins in actin-free plasma membrane  
661 vesicles measured by STED-FCS. *Mol. Biol. Cell* 28, 1507–1518.
- 662 Schneider, F., Waithe, D., Lagerholm, B.C., Shrestha, D., Sezgin, E., Eggeling, C., and  
663 Fritzsche, M. (2018). Statistical Analysis of Scanning Fluorescence Correlation Spectroscopy  
664 Data Differentiates Free from Hindered Diffusion. *ACS Nano* 12, 8540–8546.
- 665 Schneider, F., Hernandez-Varas, P., Christoffer Lagerholm, B., Shrestha, D., Sezgin, E., Julia  
666 Roberti, M., Ossato, G., Hecht, F., Eggeling, C., and Urbančič, I. (2020). High photon count  
667 rates improve the quality of super-resolution fluorescence fluctuation spectroscopy. *J. Phys. D.*  
668 *Appl. Phys.* 53, 164003.
- 669 Schwille, P., Meyer-Almes, F.J., and Rigler, R. (1997). Dual-color fluorescence cross-correlation  
670 spectroscopy for multicomponent diffusional analysis in solution. *Biophys. J.* 72, 1878–1886.
- 671 Sograte-Idrissi, S., Oleksiievets, N., Isbaner, S., Eggert-Martinez, M., Enderlein, J., Tsukanov,  
672 R., and Opazo, F. (2019). Nanobody Detection of Standard Fluorescent Proteins Enables Multi-  
673 Target DNA-PAINT with High Resolution and Minimal Displacement Errors. *Cells* 8, 48.
- 674 Sograte-Idrissi, S., Schlichthaerle, T., Duque-Afonso, C.J., Alevra, M., Strauss, S., Moser, T.,  
675 Jungmann, R., Rizzoli, S.O., and Opazo, F. (2020). Circumvention of common labelling artefacts  
676 using secondary nanobodies. *Nanoscale* 12, 8183–8191.
- 677 Stanly, T.A., Fritzsche, M., Banerji, S., García, E., Bernardino de la Serna, J., Jackson, D.G., and  
678 Eggeling, C. (2016). Critical importance of appropriate fixation conditions for faithful imaging

- 679 of receptor microclusters. *Biol. Open* 5, 1343–1350.
- 680 Sun, Y., Day, R.N., and Periasamy, A. (2011). Investigating protein-protein interactions in living  
681 cells using fluorescence lifetime imaging microscopy. *Nat. Protoc.* 6, 1324–1340.
- 682 Suzuki, K.G.N., Kasai, R.S., Hirose, K.M., Nemoto, Y.L., Ishibashi, M., Miwa, Y., Fujiwara,  
683 T.K., and Kusumi, A. (2012). Transient GPI-anchored protein homodimers are units for raft  
684 organization and function. *Nat. Chem. Biol.* 8, 774–783.
- 685 Traub, L.M. (2019). A nanobody-based molecular toolkit provides new mechanistic insight into  
686 clathrin-coat initiation. *Elife* 8, 1–42.
- 687 Tsien, R.Y. (1998). THE GREEN FLUORESCENT PROTEIN. *Annu. Rev. Biochem.* 67, 509–  
688 544.
- 689 Veerapathiran, S., and Wohland, T. (2017). The imaging FCS diffusion law in the presence of  
690 multiple diffusive modes. *Methods* 140–141, 140–150.
- 691 Waithe, D., Clausen, M.P., Sezgin, E., and Eggeling, C. (2016). FoCuS-point: software for  
692 STED fluorescence correlation and time-gated single photon counting. *Bioinformatics* 32, 958–  
693 960.
- 694 Waithe, D., Schneider, F., Chojnacki, J., Clausen, M.P., Shrestha, D., de la Serna, J.B., and  
695 Eggeling, C. (2018). Optimized processing and analysis of conventional confocal microscopy  
696 generated scanning FCS data. *Methods* 140–141, 62–73.
- 697 Weiß, K., Neef, A., Van, Q., Kramer, S., Gregor, I., and Enderlein, J. (2013). Quantifying the  
698 diffusion of membrane proteins and peptides in black lipid membranes with 2-focus fluorescence  
699 correlation spectroscopy. *Biophys. J.* 105, 455–462.
- 700 Widengren, J., Mets, U., and Rigler, R. (1995). Fluorescence correlation spectroscopy of triplet  
701 states in solution: a theoretical and experimental study. *J. Phys. Chem.* 99, 13368–13379.
- 702
